# Supplementary material for: Genetic Variation in the Pallas’s Cat (Otocolobus manul) in Zoo-Managed and Wild Populations
Source: MDPI journal article supplement (doi:10.3390/d16040228), 2024-04-10
Supplement: s1 [file s1]

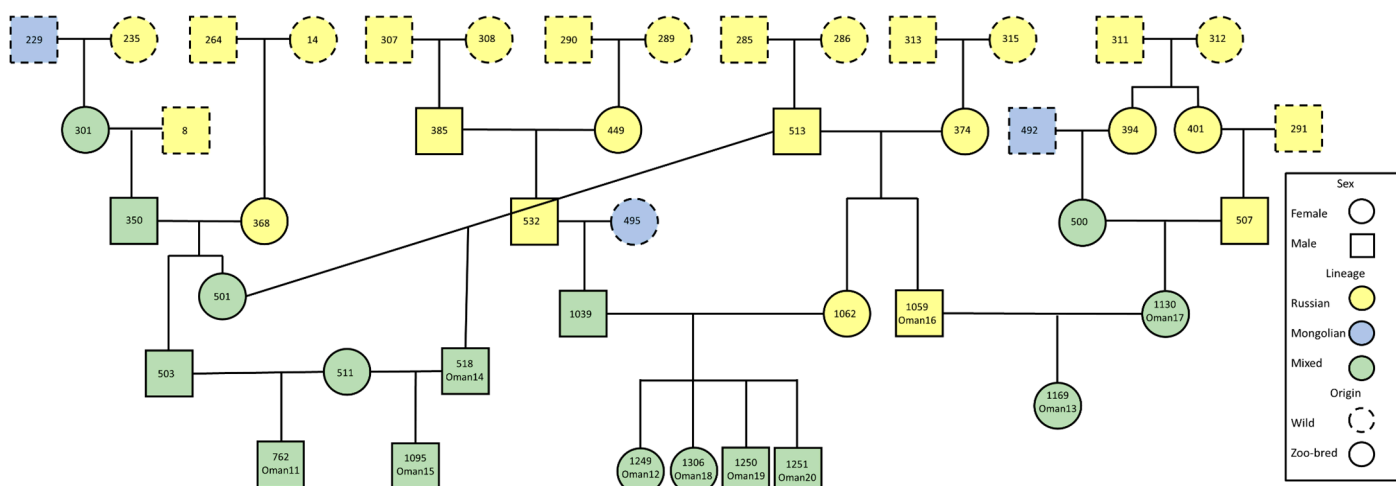

**Figure S1.** Pedigree of the ten zoo-managed Pallas’s cats (*Otocolobus manul*) sampled in this study and their founding ancestors. The ten Pallas’s cats sampled in this study are labeled Oman11 through Oman20. Each shape includes the individual’s studbook number. The pedigree information was collected from the Association of Zoos and Aquariums’ North American Regional Pallas’s Cat Studbook [15].

**Table S1.** Description of 29 microsatellites used to genotype six wild and ten zoo-managed Pallas's cats (*Otocolobus manul*). These loci were previously used in an analysis of range-wide snow leopard (*Panthera uncia*) phylogeography diversity [31]. The amplified loci are the same as the domestic cat (*Felis catus*) loci from [33,34] but were redesigned but to match snow leopard sequence and amplify shorter amplicons to increase genotyping success in scat DNA (i.e., PUN1157 corresponds to FCA1157). The size ranges for *P. uncia* were collected from [31]. The wild Pallas's cat scats were collected in Shenza, Tibet Autonomous Region (n = 1) and the Western and Eastern Beauties of Mongolia (n = 2 and n = 3, respectively).

| Designation | Total A <sub>N</sub> | Total A <sub>E</sub> | P <sub>ID</sub> | Wild A <sub>N</sub> | Wild A <sub>E</sub> | Zoo A <sub>N</sub> | Zoo A <sub>E</sub> | Size Range (bp) | Size Range (bp) |
|-------------|----------------------|----------------------|-----------------|---------------------|---------------------|--------------------|--------------------|-----------------|-----------------|
|             |                      |                      |                 |                     |                     |                    |                    | <i>O. manul</i> | <i>P. uncia</i> |
| PUN1157F    | 5                    | 2.286                | 0.252           | 5                   | 3.130               | 2                  | 1.835              | 100 – 108       | 92 – 112        |
| PUN843P     | 5                    | 2.236                | 0.245           | 4                   | 2.057               | 4                  | 2.198              | 104 – 116       | 106 – 114       |
| PUN935F     | 4                    | 2.107                | 0.292           | 3                   | 1.674               | 3                  | 2.151              | 118 – 134       | 103 – 125       |
| PUN894V     | 5                    | 3.066                | 0.162           | 4                   | 3.429               | 2                  | 1.724              | 111 – 119       | 106 – 124       |
| PUN124N     | 4                    | 3.103                | 0.170           | 4                   | 3.130               | 3                  | 2.632              | 102 – 108       | 88 – 102        |
| PUN272P     | 5                    | 2.639                | 0.201           | 3                   | 2.182               | 3                  | 2.198              | 120 – 128       | 120 – 138       |
| PUN82F      | 7                    | 3.606                | 0.120           | 7                   | 6.000               | 4                  | 2.439              | 97 – 109        | 99 – 113        |
| PUN1262N    | 6                    | 3.606                | 0.114           | 5                   | 3.600               | 3                  | 2.410              | 116 – 130       | 118 – 128       |
| PUN225P     | 4                    | 2.926                | 0.185           | 3                   | 2.667               | 3                  | 2.198              | 170–178         | 166 – 182       |
| PUN100F     | 8                    | 4.531                | 0.079           | 5                   | 4.500               | 6                  | 3.846              | 84 – 102        | 88 – 98         |
| PUN1283N    | 4                    | 2.510                | 0.235           | 4                   | 2.483               | 3                  | 1.802              | 131 – 137       | 123 – 131       |
| PUN668P     | 6                    | 5.224                | 0.065           | 4                   | 4.000               | 5                  | 4.255              | 194 – 204       | 175 – 191       |
| PUN80F      | 1                    | 1.000                | 1.000           | 1                   | 1.000               | 1                  | 1.000              | 91              | 100 – 120       |
| PUN1270N    | 7                    | 3.710                | 0.107           | 6                   | 4.000               | 5                  | 2.410              | 137 – 163       | 122 – 144       |
| PUN1030F    | 6                    | 3.368                | 0.125           | 5                   | 4.800               | 4                  | 2.299              | 107 – 119       | 104 – 122       |
| PUN9013D1V  | 6                    | 4.339                | 0.091           | 4                   | 2.667               | 3                  | 2.817              | 89 – 99         | 86 – 98         |
| PUN1275N    | 3                    | 2.723                | 0.212           | 3                   | 2.571               | 3                  | 2.778              | 145 – 149       | 128 – 148       |
| PUN1047F    | 6                    | 4.655                | 0.079           | 5                   | 4.500               | 4                  | 2.941              | 111 – 121       | 112 – 118       |
| PUN917V     | 2                    | 1.133                | 0.786           | 1                   | 1.000               | 2                  | 1.220              | 160 – 162       | 156 – 162       |
| PUN1289N    | 3                    | 1.210                | 0.691           | 2                   | 1.180               | 3                  | 1.227              | 112 – 130       | 108 – 142       |
| PUN347P     | 2                    | 1.822                | 0.403           | 2                   | 1.600               | 2                  | 1.923              | 116 – 120       | 110 – 122       |
| PUN1131F    | 9                    | 6.649                | 0.041           | 4                   | 2.769               | 7                  | 5.263              | 103 – 123       | 92 – 124        |
| PUN924V     | 5                    | 2.695                | 0.191           | 3                   | 2.880               | 4                  | 2.041              | 143 – 159       | 124 – 144       |
| PUN1293N    | 7                    | 4.655                | 0.078           | 4                   | 2.667               | 5                  | 3.333              | 116 – 128       | 112 – 124       |
| PUN44P      | 6                    | 3.879                | 0.103           | 5                   | 3.600               | 3                  | 2.062              | 112 – 126       | 110 – 122       |
| PUN1138F    | 5                    | 3.282                | 0.134           | 3                   | 2.571               | 4                  | 1.695              | 108 – 118       | 106 – 116       |
| PUN928V     | 6                    | 4.197                | 0.091           | 5                   | 4.500               | 5                  | 3.077              | 108 – 118       | 106 – 116       |
| PUN1307N    | 8                    | 4.303                | 0.080           | 7                   | 5.538               | 4                  | 2.381              | 103 – 119       | 102 – 114       |
| PUN664P     | 3                    | 2.359                | 0.269           | 3                   | 1.946               | 3                  | 2.381              | 148 – 152       | 136 – 146       |

A<sub>N</sub> = number of alleles, A<sub>E</sub> = effective number of alleles ( $1/(\sum p^2)$ ), P<sub>ID</sub> = probability of identity

**Table S2.** The nine multiplex panels of the 29 microsatellite primers used to genotype six wild and ten zoo-managed Pallas's cats (*Otocolobus manul*). These loci were previously used in an analysis of range-wide snow leopard (*Panthera uncia*) phylogeography diversity [31]. As specified by [31], each primer was designated by the prefix "PUN" and respective locus number used by [33,34]. All microsatellite primers were directly labeled with the fluorescent dyes VIC (V), FAM (F), NED (N), and PET (P). The wild Pallas's cat scats were collected in Shenza, Tibet Autonomous Region (n = 1) and the Western and Eastern Beauties of Mongolia (n = 2 and n = 3, respectively).

| <i>Uncia</i> A | <i>Uncia</i> B | <i>Uncia</i> C | <i>Uncia</i> D | <i>Uncia</i> E | <i>Uncia</i> F | <i>Uncia</i> G | <i>Uncia</i> H | <i>Uncia</i> I |
|----------------|----------------|----------------|----------------|----------------|----------------|----------------|----------------|----------------|
| PUN1157F       | PUN935F        | PUN82F         | PUN100F        | PUN80F         | PUN1030F       | PUN1047F       | PUN1131F       | PUN1138F       |
| PUN843P        | PUN894V        | PUN1262N       | PUN1283N       | PUN1270N       | PUN9013D1V     | PUN917V        | PUN924V        | PUN928V        |
|                | PUN124N        | PUN225P        | PUN668P        |                | PUN1275N       | PUN1289        | PUN1293N       | PUN1307N       |
|                | PUN272P        |                |                |                |                | PUN347P        | PUN44P         | PUN664P        |

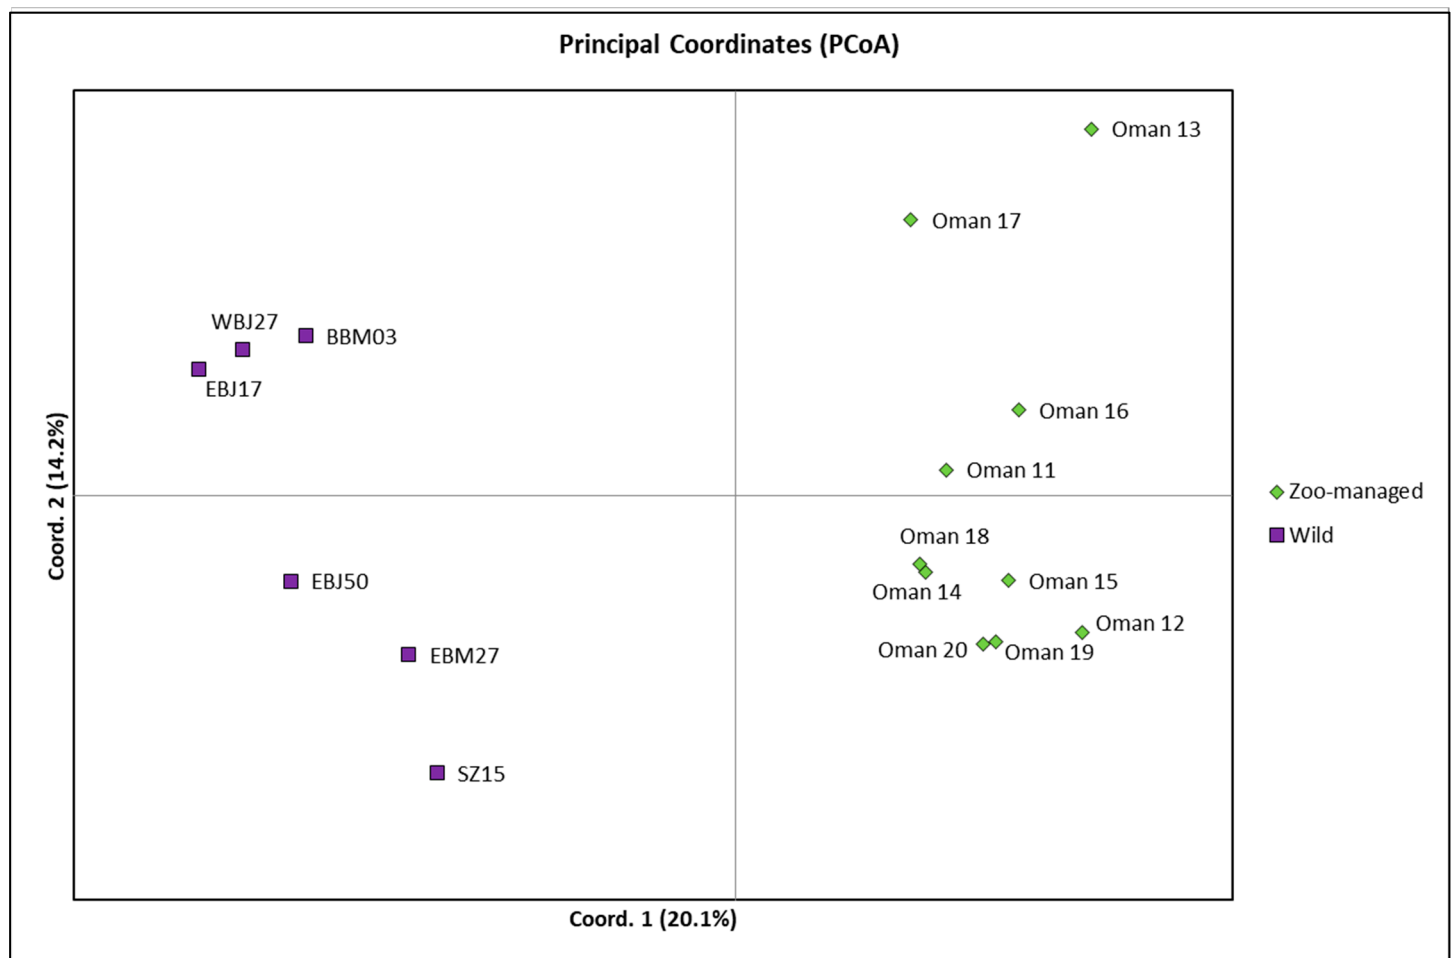

**Figure S2.** Principal coordinate analysis of six wild and ten zoo-managed Pallas's cats (*Otocolobus manul*) genotyped at 29 microsatellite loci. The associated pairwise  $F_{ST}$  value between the zoo-managed (green diamonds) and wild individuals (purple squares) was  $F_{ST} = 0.143$  ( $P = 0.001$ ). The wild Pallas's cat scats were collected in Shenza, Tibet Autonomous Region ( $n = 1$ ) and the Western and Eastern Beauties of Mongolia ( $n = 2$  and  $n = 3$ , respectively).

Haplotype 1

Definition:

TTAGCCCTAAACTTAGATAGTTAACTTAACAAAACCTATCCGCCAGAGAACTACTA-  
GCCACAGCTTAAAACTCAAAGGACTTGGCGGTGCTT

Haplotype ID:

Oman11, Oman14, Oman17

SZ15, WBJ27, BBM03, EBJ17, EBM27, EBJ50

MH48879.1, KR132585.1

Haplotype 2

Definition:

TTAGCCCTAAACTTAGATAGTTAACTTAACAAAACCTATCCGCCAGAGAACTACTA-  
GCCACAGCTTAAAACTCAAAGGACTTGGCGGTGCTT

Haplotype ID:

Oman13, Oman15

Haplotype 3

Definition:

TTAGCCCTAAACTTAGATAGTTAGCTTAACAAAACCTATCCGCCAGAGAACTACTA-  
GCCACAGCTTAAAACTCAAAGGACTTGGCGGTGCTT

Haplotype ID:

Oman12, Oman16, Oman18, Oman19, Oman20

KX098454.1, KX098455.1, MH978908.1, NC\_028323.1

**Figure S3.** Three observed mitochondrial 12S ribosomal RNA (MT-RNR1) haplotypes in 22 Pallas's cats (*Otocolobus manul*). The 91 bp sequences were amplified using primers 12SV5F/12SV5R [44]. The two segregating sites are highlighted. Pallas's cat sequences were collected from six cats collected during noninvasive surveys in Shenza, Tibet Autonomous Region (SZ15; n = 1) and the Western and Eastern Beauties of Mongolia (n = 2; WBJ27; BBM03 and n = 3; EBJ17; EBM27; EBJ50, respectively), ten zoo-managed Pallas's cats (Oman11 to Oman20), and six sequences available through GenBank (KX098454.1, KX098455.1, MH978908.1, NC\_028323.1, MH48879.1, KR132585.1).
